# Supplementary material
Source: PubMed Central journal article supplement (PMC4249342)
Supplement: IAI.02225-14_zii011140924so2.pdf [file IAI.02225-14_zii011140924so2.pdf]

**Supplementary Table 1. Summary statistics for EF3030 mapped to SPnINV200 and ST556 genomes**

|                 | Total reads | High quality reads | Reads mapped to SPNINV200 n (%) | Reads mapped to ST556 n (%) | rRNA reads n(%) |
|-----------------|-------------|--------------------|---------------------------------|-----------------------------|-----------------|
| Biofilm 1       | 22,989,262  | 22,649,206         | 20,940,678 (92.6)               | 19853392 (87.7)             | 325,800 (1.4)   |
| Biofilm 2       | 24,705,706  | 24,280,524         | 21,951,677 (90.4)               | 20,716,506 (85.3)           | 211,667 (0.9)   |
| Influenza       | 46,497,496  | 45,861,944         | 42,784,808 (93.2)               | 38,722,851 (84.4)           | 188,942 (0.4)   |
| Heat 1          | 21,798,352  | 21,482,117         | 19,906,228 (92.6)               | 18,483,398 (86.0)           | 688,763 (3.2)   |
| Heat 2          | 19,428,005  | 19,039,927         | 11,208,746 (58.9)               | 10,531,256 (55.3)           | 1,622,506 (8.5) |
| ATP             | 36,288,565  | 35,797,340         | 33,538,459 (93.6)               | 31,515,347 (88.0)           | 72,751 (0.2)    |
| 37°C planktonic | 20,425,563  | 20,128,194         | 18,408,089 (91.5)               | 17,501,137 (86.9)           | 429,760 (2.1)   |
| 37°C planktonic | 50,971,046  | 50,354,660         | 45,949,104 (91.2)               | 43,681,799 (86.7)           | 308,541 (0.6)   |
