# Supplementary material
Source: PubMed Central journal article supplement (PMC4249342)
Supplement: IAI.02225-14_zii011140924so9.pdf [file IAI.02225-14_zii011140924so9.pdf]

**Table S8. Primers used for qRT-PCR**

| <b>Primer name</b> | <b>Sequence</b>          |
|--------------------|--------------------------|
| BlpH-F             | TTTTCGCCATGACTACACCA     |
| BlpH-R             | CAATCGGCCAAGGTCATATT     |
| BlpX-F             | GTGGGCGGTAAAAATCAAGGA    |
| BlpX-R             | AATCAACCTCGCATCCAAAC     |
| BlpM-F             | TAGAAGGTGGTGGTGGCTGCT    |
| BlpM-R             | CCTGTTACTCCTGCCCAAAG     |
| ZmpA-F             | GCTATTGTTGAACCCGCAAT     |
| ZmpA-R             | TGCTTCCGATAGCTCTGGTT     |
| GlpO-F             | AAGCTGTGAGCAAGTGCAAA     |
| GlpO-R             | GGAGAATTGAACCCAGCAAA     |
| GyrA-F             | ATGGTCTCAAAGCGCTGAAT     |
| GyrA-R             | TGGCGATACGACTCATACCA     |
| NanA-F             | GAAGCGAAAGTGAAGCGAAC     |
| NanA-R             | TGGGTTAGGAAAGTCGCTGT     |
| PspA-F             | CGCTAATGGTGCTATGGCTA     |
| PspA-R             | CGTTGACTTTAGCCCAACCT     |
| ComD-F             | GGTTCGTATCATGAGCGTTT     |
| ComD-R             | CCTGAAGGAGTCATCGTCAT     |
| PavA-F             | TGCTAAGGACATTCTGGAAGCCA  |
| PavA-R             | AACTCTGCTGCGTCTGTCTTACT  |
| LicD2-F            | ACGAGCAGTTCACGGTGATAGCAA |
| LicD2-R            | ATCCCTTCCTTACCGATCCCAACT |
| LytA-F             | GGCTGGCAGAAGAATGACACTG   |
| LytA-R             | GCCGTCTGTGTGCTTCCT       |
| PspA-F             | CGCTAATGGTGCTATGGCTA     |
| PspA-R             | CGTTGACTTTAGCCCAACCT     |
| Ply-F              | GCAAATAAAGCAGTAAAT       |
| Ply-R              | CCAGGATAGAGGCGAC         |
| CspB-F             | TGCAAAGAAGTGGCAGATG      |
| CspB-R             | CGTGATTCCCAACATCAAAA     |
